# Supplementary material for: Facile and fast fabrication of iron-phosphate supported on nickel foam as a highly efficient and stable oxygen evolution catalyst
Source: Royal Society of Chemistry journal article supplement (doi:10.1039/c7ta05580c), 2017-01-01
Supplement: c7ta05580c1.pdf [file c7ta05580c1.pdf]

## Facile and fast fabrication of iron-phosphate supported on nickel foam as a highly efficient and stable oxygen evolution catalyst

Dazhong Zhong,<sup>ab</sup> Lin Liu,<sup>ab</sup> Dandan Li,<sup>ab</sup> Congcong Wei,<sup>ab</sup> Qiang Wang,<sup>ab</sup> Genyan Hao,<sup>ab</sup> Qiang Zhao,<sup>\*ab</sup> and Jinping Li<sup>\*ab</sup>

<sup>a</sup>Research Institute of Special Chemicals, Taiyuan University of Technology, Taiyuan 030024, Shanxi, P.R. China.

<sup>b</sup>Shanxi Key Laboratory of Gas Energy Efficient and Clean Utilization, Taiyuan 030024, Shanxi, P.R. China.

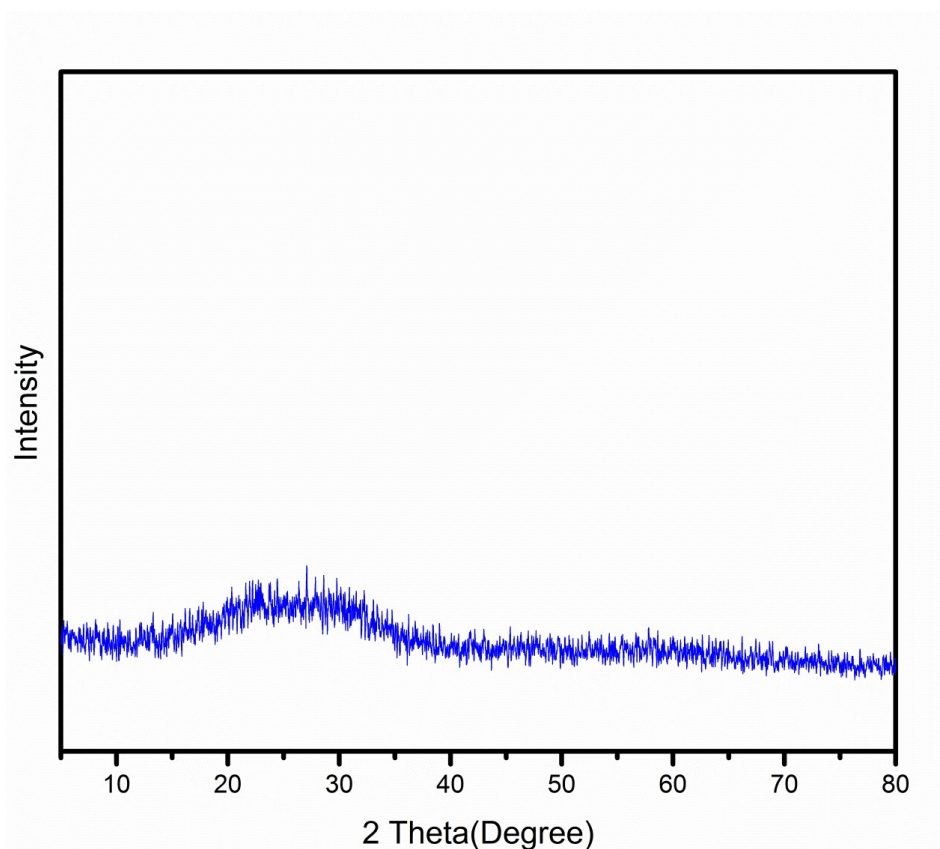

**Fig. S1.** XRD pattern of powder- Fe-Pi.

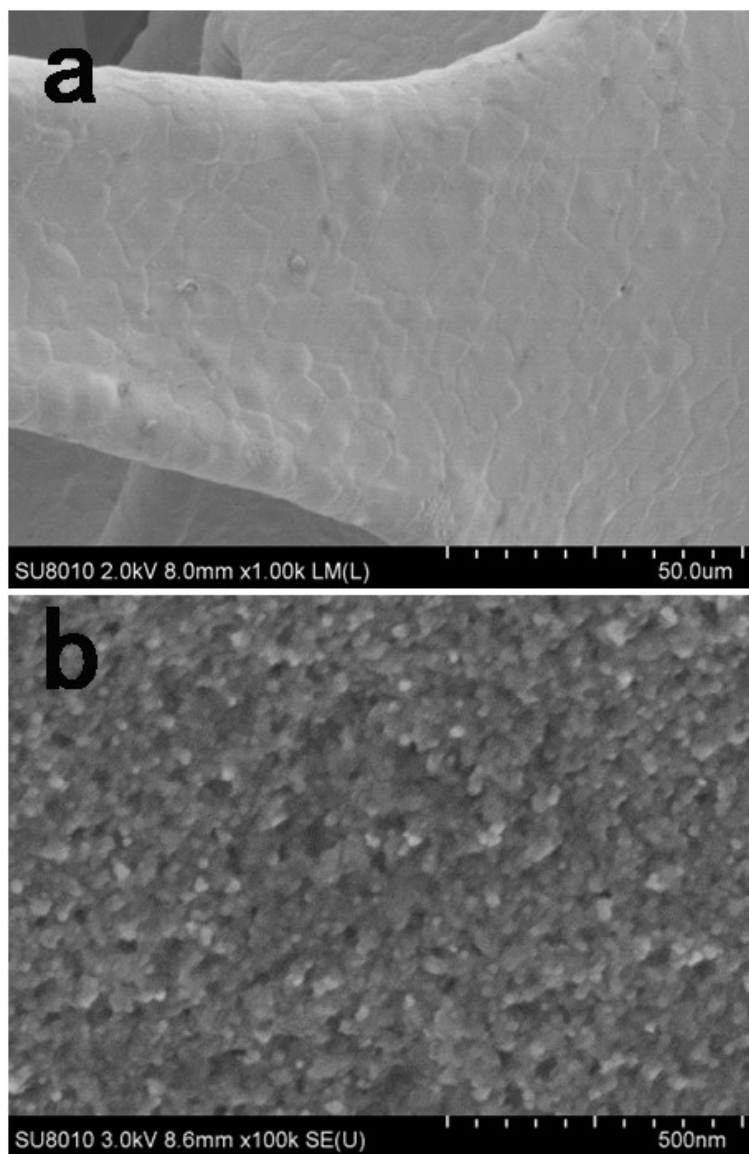

**Fig. S2.** SEM images of a) the NF substrate and b) an Fe(OH)<sub>3</sub>/NF electrode.

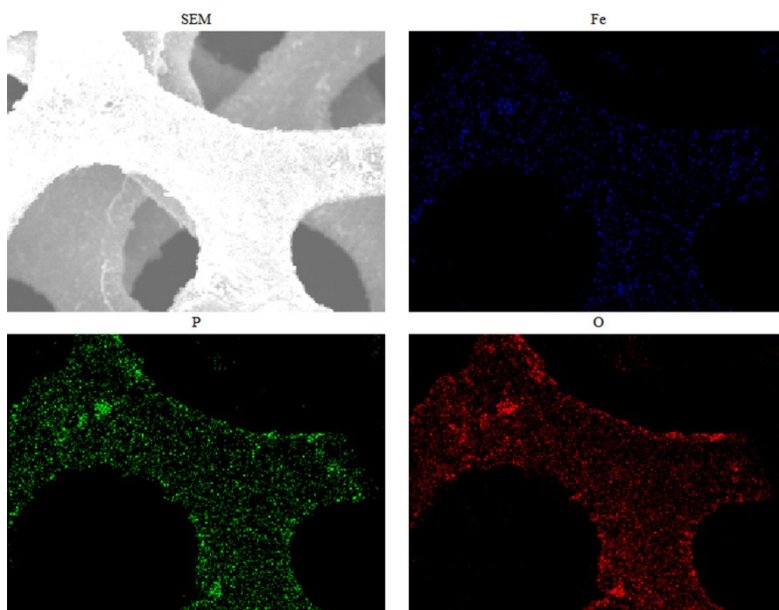

**Fig. S3.** SEM-EDX mappings of Fe-Pi/NF.

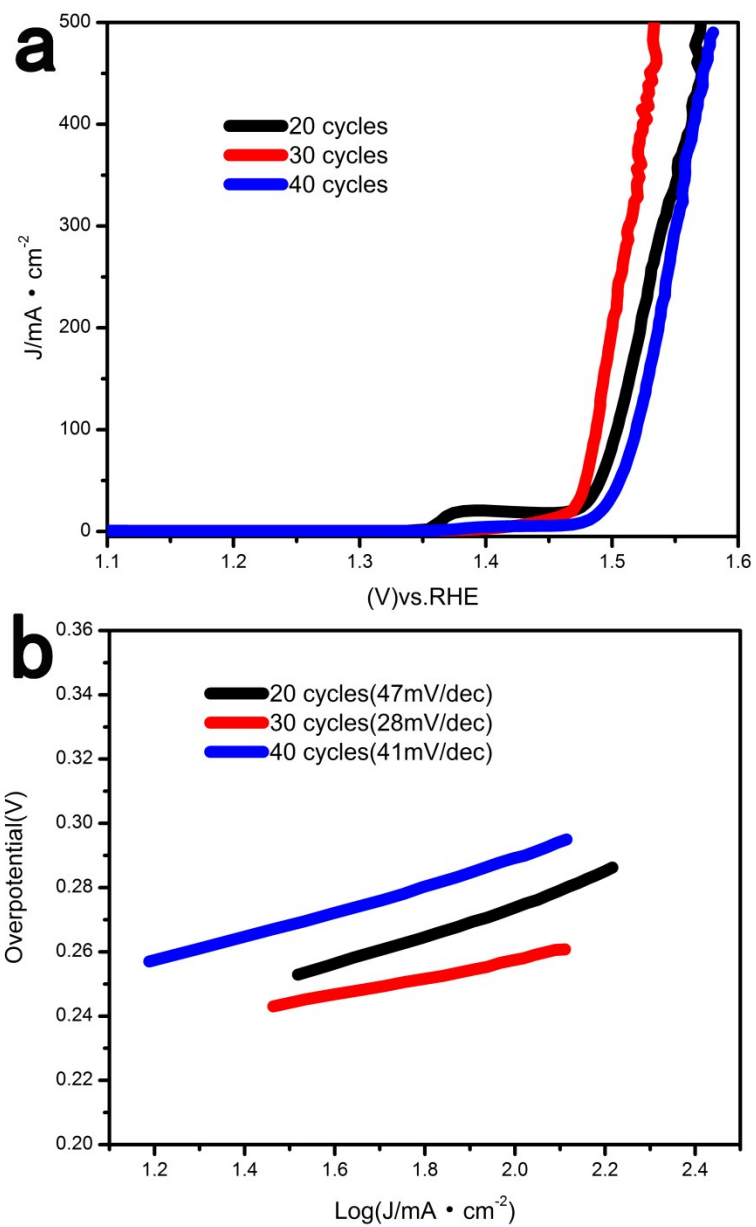

**Fig. S4.** a) Polarization curves for Fe-Pi/NF prepared with different numbers of cycles. b) The corresponding Tafel plots.

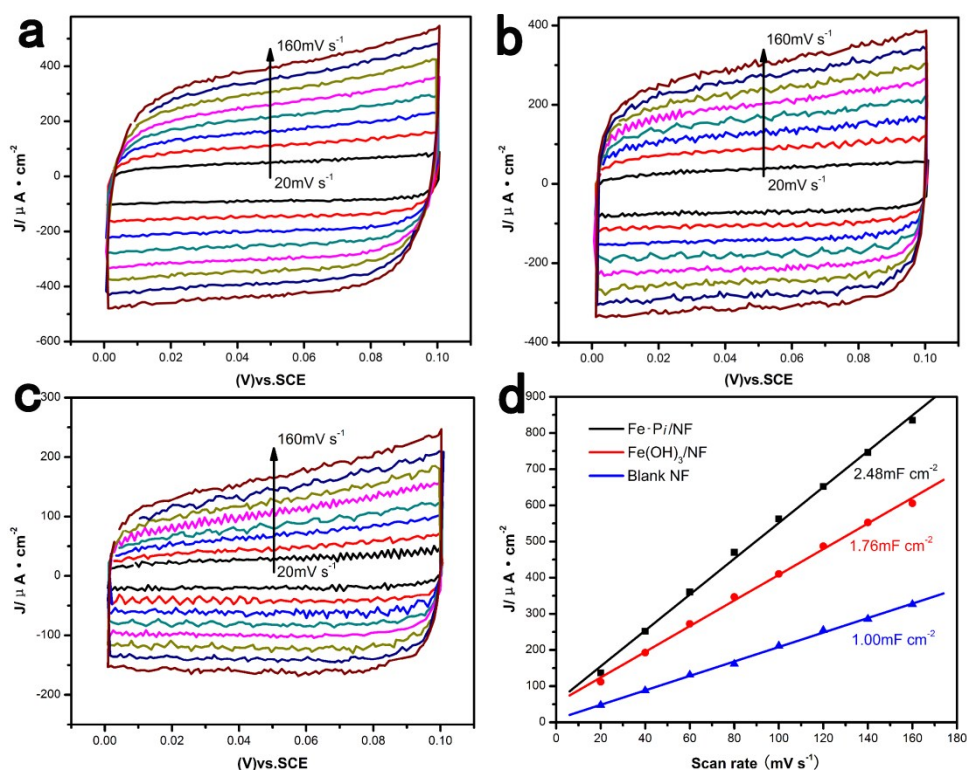

**Fig. S5.** Double-layer capacitance measurements of: a) Fe-Pi/NF, b) Fe(OH)<sub>3</sub>/NF, and c) Blank NF. d) Charging current density differences plotted against scan rates. The linear slope, equivalent to twice the double-layer capacitance,  $C_{dl}$ , was used to represent the ECSA.

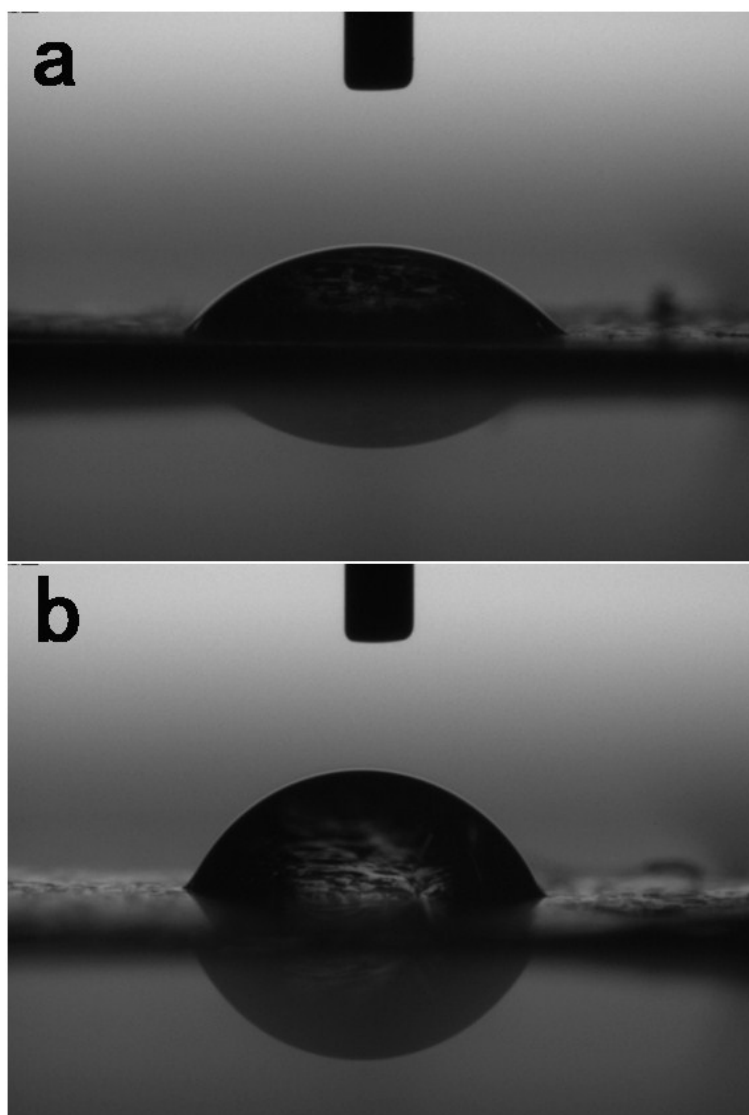

**Fig. S6.** Water contact-angle images of: a) Fe-Pi/NF and b) Fe(OH)<sub>3</sub>/NF.

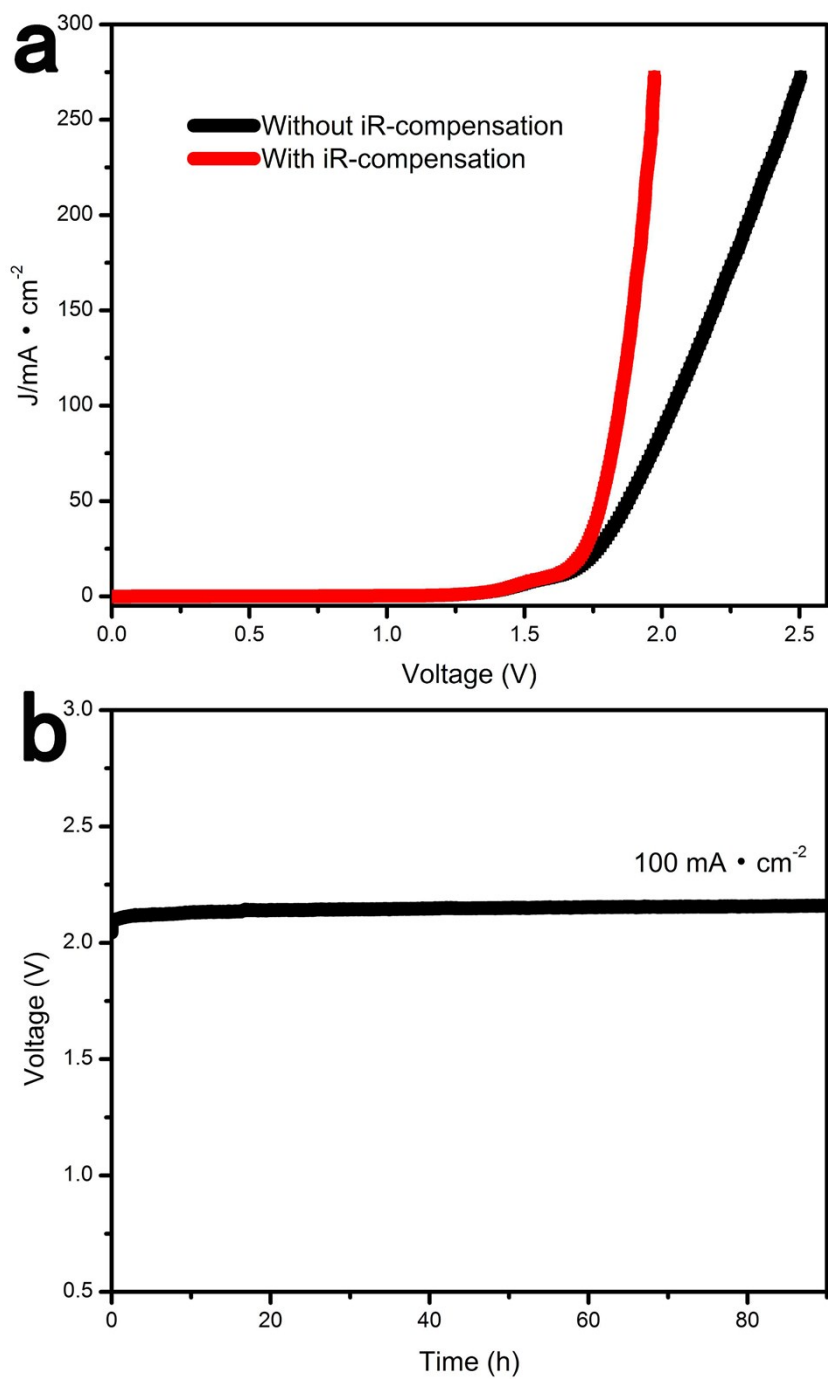

**Fig. S7.** a) LSV curves for overall water splitting in a two-electrode system. b) Chronopotentiometric curve for the two-electrode system at a constant current density of  $100 \text{ mA cm}^{-2}$  without  $iR$  compensation. Fe-Pi/NF as anode and blank NF as cathode in the two-electrode system. All experiments were carried out in 1.0 M KOH.

**Table S1.** Comparison of OER performance for Fe-Pi/NF with those of state-of-the-art electrocatalysts under alkaline conditions.

| Material                                                 | Electrolyte (KOH) | $\eta$ @10 mA $\text{cm}^{-2}$ (mV) | Tafel slope ( $\text{mV dec}^{-1}$ ) | Reference       |
|----------------------------------------------------------|-------------------|-------------------------------------|--------------------------------------|-----------------|
| Fe-Pi/NF                                                 | 1 M               | 215                                 | 28                                   | This work.      |
| $\alpha$ -FeNiOx                                         | 0.1 M             | 210 $\pm$ 10 @1 mA $\text{cm}^{-2}$ | 24 $\pm$ 4                           | S <sup>1</sup>  |
| NiSe/NF                                                  | 1 M               | 270 @20 mA $\text{cm}^{-2}$         | 64                                   | S <sup>2</sup>  |
| NiFe-LDH/CNT                                             | 1 M               | 240                                 | 31                                   | S <sup>3</sup>  |
| Ni-P                                                     | 1 M               | 300                                 | 64                                   | S <sup>4</sup>  |
| $\alpha$ -Ni(OH) <sub>2</sub>                            | 0.1 M             | 331                                 | 42                                   | S <sup>5</sup>  |
| NiFe LDH/NF                                              | 1 M               | 240                                 |                                      | S <sup>6</sup>  |
| CoO/hi-Mn <sub>3</sub> O <sub>4</sub>                    | 1 M               | 378                                 | 61                                   | S <sup>7</sup>  |
| W <sub>0.5</sub> Co <sub>0.4</sub> Fe <sub>0.1</sub> /NF | 1 M               | 250                                 | 32                                   | S <sup>8</sup>  |
| NiFe LDH-NS@DG10                                         | 1 M               | 210                                 | 52                                   | S <sup>9</sup>  |
| NiFeOx/IF                                                | 1 M               | 220                                 | 34                                   | S <sup>10</sup> |
| Ni-Fe-OH@Ni <sub>3</sub> S <sub>2</sub> /NF              | 1 M               | 165                                 | 93                                   | S <sup>11</sup> |
| CoMnP nanoparticles                                      | 1 M               | 330                                 | 61                                   | S <sup>12</sup> |
| Ni:Pi-Fe/NF                                              | 1 M               | 220                                 |                                      | S <sup>13</sup> |



**Table S2.** Comparison of the TOF value for Fe-Pi/NF with those of state-of-the-art electrocatalysts under alkaline conditions.

| Material                                  | Electrolyte (KOH) | TOF ( $s^{-1}$ )        | Reference       |
|-------------------------------------------|-------------------|-------------------------|-----------------|
| Fe-Pi/NF                                  | 1 M               | 0.381 @ $\eta$ =270 mV  | This work.      |
| Fe-Pi/NF                                  | 1 M               | 0.838 @ $\eta$ =300 mV  | This work.      |
| NiFe-LDH/CNT                              | 1 M               | 0.56 @ $\eta$ =300 mV   | S <sup>3</sup>  |
| NiFeMn-LDH                                | 1 M               | 0.038 @ $\eta$ =300 mV  | S <sup>14</sup> |
| $\alpha$ -Ni(OH) <sub>2</sub>             | 0.1 M             | 0.0361 @ $\eta$ =350 mV | S <sup>5</sup>  |
| Gelled FeCoW                              | 1 M               | 0.46 @ $\eta$ =300 mV   | S <sup>15</sup> |
| Ni <sub>2</sub> P/Ni/NF                   | 1 M               | 0.015 @ $\eta$ =350 mV  | S <sup>16</sup> |
| Ni <sub>45</sub> Fe <sub>55</sub>         | 0.1 M             | 0.14 @ $\eta$ =300 mV   | S <sup>17</sup> |
| Ni/birnessite                             | 1 M               | 0.061 @ $\eta$ =400 mV  | S <sup>18</sup> |
| NiCeOx-Au                                 | 1 M NaOH          | 0.08 @ $\eta$ =280 mV   | S <sup>19</sup> |
| CCS Ni-Co Nanowire                        | 1 M               | 0.0086 @ $\eta$ =300 mV | S <sup>20</sup> |
| FeNiOx film                               | 1 M               | 0.68 @ $\eta$ =310 mV   | S <sup>21</sup> |
| Ni <sub>0.75</sub> V <sub>0.25</sub> -LDH | 1 M               | 0.054 @ $\eta$ =350 mV  | S <sup>22</sup> |
| NiFe-DAT film                             | 1M NaOH           | 0.42 @ $\eta$ =300 mV   | S <sup>23</sup> |

**Table S3.** The Rs and Rct values of the catalysts from EIS spectra (Fig. 4a) simulated using the corresponding equivalent circuit.

| Sample                  | Rs( $\Omega$ ) | R <sub>1</sub> ( $\Omega$ ) | Rct( $\Omega$ ) |
|-------------------------|----------------|-----------------------------|-----------------|
| Fe-Pi/NF                | 1.35           | 1.89                        | 0.19            |
| Fe(OH) <sub>3</sub> /NF | 0.98           | 0.37                        | 0.52            |
| RuO <sub>2</sub> /NF    | 1.15           | 1.34                        | 4.91            |

## Notes and references

1. R. D. L. Smith, M. S. Prévot, R. D. Fagan, Z. Zhang, P. A. Sedach, M. K. J. Siu, S. Trudel and C. P. Berlinguette, *Science*, 2013, 340, 60-63.
2. C. Tang, N. Cheng, Z. Pu, W. Xing and X. Sun, *Angew. Chem. Int. Ed. Engl.*, 2015, 54, 9351-9355.
3. M. Gong, Y. Li, H. Wang, Y. Liang, J. Z. Wu, J. Zhou, J. Wang, T. Regier, F. Wei and H. Dai, *J. Am. Chem. Soc.*, 2013, 135, 8452-8455.
4. X.-Y. Yu, Y. Feng, B. Guan, X. W. Lou and U. Paik, *Energy Environ. Sci.*, 2016, 9, (4), 1246-1250.
5. M. Gao, W. Sheng, Z. Zhuang, Q. Fang, S. Gu, J. Jiang and Y. Yan, *J. Am. Chem. Soc.*, 2014, 136, 7077-7084.
6. J. Luo, J.-H. Im, M. T. Mayer, M. Schreier, M. K. Nazeeruddin, N.-G. Park, S. D. Tilley, H. J. Fan and M. Grätzel, *Science*, 2014, 345, 1593-1566.
7. C. Guo, Y. Zheng, J. Ran, F. Xie, M. Jaroniec and S. Z. Qiao, *Angewandte Chemie*, 2017, DOI: 10.1002/anie.201701531.
8. Y. Pi, Q. Shao, P. Wang, F. Lv, S. Guo, J. Guo and X. Huang, *Angew. Chem. Int. Ed. Engl.*, 2017, **2017**, 56,4502-4506
9. Y. Jia, L. Zhang, G. Gao, H. Chen, B. Wang, J. Zhou, M. T. Soo, M. Hong, X. Yan, G. Qian, J. Zou, A. Du and X. Yao, *Advanced Materials*, 2017, DOI: 10.1002/adma.201700017.
10. J. Wang, L. Ji, S. Zuo and Z. Chen, *Adv. Energy Mater.*, 2017, DOI: 10.1002/aenm.201700107
11. X. Zou, Y. Liu, G.-D. Li, Y. Wu, D.-P. Liu, W. Li, H.-W. Li, D. Wang, Y. Zhang and X. Zou, *Adv. Mater.* 2017, DOI: 10.1002/adma.201700404.
12. D. Li, H. Baydoun, C. N. Verani and S. L. Brock, *J. Am. Chem. Soc.* **2016**, 138, (12), 4006-4009
13. Y. Li and C. Zhao, *Chem. Mater.*, 2016, 28, 5659-5666.
14. Z. Lu, L. Qian, Y. Tian, Y. Li, X. Sun and X. Duan, *Chem. Commun.*, 2016, 52, 908-911.
15. B. Zhang, X. Zheng, O. Voznyy, R. Comin, M. Bajdich, M. García-Melchor, L. Han, J. Xu, M. Liu, L. Zheng, F. P. G. d. Arquer, C. T. Dinh, F. Fan, M. Yuan, E. Yassitepe, N. Chen, T. Regier, P. Liu, Y. Li, P. D. Luna, A. Janmohamed, H. L. Xin, H. Yang, A. Vojvodic and E. H. Sargent, *Science*, 2016, 352, 333-337.
16. B. You, N. Jiang, M. Sheng, M. W. Bhushan and Y. Sun, *ACS Catal.*, 2016, 6, 714-721.
17. M. Goerlin, P. Chernev, J. Ferreira de Araujo, T. Reier, S. Dresp, B. Paul, R. Kraehnert, H. Dau and P. Strasser, *J. Am. Chem. Soc.* **2016**, 138 (17), 5603-5614
18. A. C. Thenuwara, E. B. Cerkez, S. L. Shumlas, N. H. Attanayake, I. G. McKendry, L. Frazer, E. Borguet, Q. Kang, R. C. Remsing, M. L. Klein, M. J. Zdilla and D. R. Strongin, *Angew. Chem. Int. Ed.* **2016**, 55 (35), 10381-10385

19. J. W. D. Ng, M. García-Melchor, M. Bajdich, P. Chakthranont, C. Kirk, A. Vojvodic and T. F. Jaramillo, *Nature Energy*, 2016, 1, 16053.
20. S.-H. Bae, J.-E. Kim, H. Randriamahazaka, S.-Y. Moon, J.-Y. Park and I.-K. Oh, *Adv. Energy Mater.* **2016**, 1601492.
21. J. Wang, L. Ji and Z. Chen, *ACS Catal.*, 2016, 6, 6987-6992.
22. K. Fan, H. Chen, Y. Ji, H. Huang, P. M. Claesson, Q. Daniel, B. Philippe, H. Rensmo, F. Li, Y. Luo and L. Sun, *Nat. Commun.*, 2016, 7, 11981.
23. T. T. H. Hoang and A. A. Gewirth, *ACS Catal.*, 2016, 6, 1159-1164.
